# Supplementary material for: Do AMF and Irrigation Regimes Affect Sweet Pepper Fruit Quality under Open Field Conditions?
Source: MDPI journal article supplement (doi:10.3390/agronomy11112349), 2021-11-19
Supplement: s1 [file s1]

**Table S1.** Weather conditions in the years 2016–2018 during vegetation of sweet pepper compared with means from 1951–2010.

|               | Temperature (°C) |      |      |           | Rainfall (mm) |       |       |           |
|---------------|------------------|------|------|-----------|---------------|-------|-------|-----------|
|               | 2016             | 2017 | 2018 | 1951–2010 | 2016          | 2017  | 2018  | 1951–2010 |
| May           | 15.3             | 15.1 | 17.1 | 13.0      | 37.9          | 29.1  | 56.1  | 60.7      |
| June          | 18.6             | 18.6 | 18.8 | 16.3      | 43.4          | 28.2  | 64.9  | 65.9      |
| July          | 18.4             | 19.0 | 20.5 | 18.0      | 129.7         | 107.9 | 124.6 | 82.0      |
| August        | 18.8             | 20.0 | 20.8 | 18.0      | 71.5          | 48.0  | 71.8  | 70.7      |
| September     | 15.2             | 14.0 | 15.5 | 12.6      | 10.7          | 77.0  | 68.1  | 53.7      |
|               | Mean             |      |      |           | Total         |       |       |           |
| May-September | 17.1             | 17.2 | 18.5 | 15.4      | 293.2         | 290.2 | 385.5 | 333.0     |

**Table S2.** Instrumental conditions for the mineral element determination in peppers fruits.

| Element | Wavelength (nm) | Fuel Flow (L/min) | Lamp Current (mA) | Flame Type    | Slit Width (nm) |
|---------|-----------------|-------------------|-------------------|---------------|-----------------|
| K       | 766.5           | 2.00              | -                 | Air-acetylene | 0.2             |
| Na      | 589.0           | 2.00              | -                 | Air-acetylene | 0.2             |
| Ca      | 422.7           | 2.00              | 10                | Air-acetylene | 0.5             |
| Mg      | 248.3           | 2.00              | 40                | Air-acetylene | 1.0             |
| Fe      | 202.6           | 2.00              | 5                 | Air-acetylene | 0.2             |
